# Supplementary material for: A Phase 2/3 study of S-217622 in participants with SARS-CoV-2 infection (Phase 3 part)
Source: medRxiv preprint, doi:10.1101/2022.07.15.22277670, version 3 (2023-01-12)
Supplement: Supplemental Table 1 [file 277670_file06.docx]

**Supplemental Table 1.** COVID-19 symptom score.

| **S. No.** | **Symptoma** | **Responseb** |
| --- | --- | --- |
| **1.** | Low energy or tiredness | 0: None  1: Mild  2: Moderate  3: Severe |
| **2.** | Muscle or body aches |
| **3.** | Headache |
| **4.** | Chills or shivering |
| **5.** | Feeling hot or feverish |
| **6.** | Stuffy or runny nose |
| **7.** | Sore throat |
| **8.** | Cough |
| **9.** | Shortness of breath (difficulty breathing) |
| **10.** | Nausea (feeling like you wanted to throw up) |
| **11.** | Vomiting (throw up) |
| **12.** | Diarrhea (loose or watery stools) |
| **13** | Rate your sense of smell in the last 24 hours | 0: My sense of smell is **the same as usual**  1: My sense of smell is **less than usual**  2: I have **no** sense of smell |
| **14.** | Rate your sense of taste in the last 24 hours | 0: My sense of taste is **the same as usual**  1: My sense of taste is **less than usual**  2: I have **no** sense of taste |

aFor items 1–10, sample item wording could be: “What was the severity of your symptom at its worst over the last 24 hours?”

bScore values are included in the table for ease of reference. The FDA cautions against including the score values within the response options presented to patients to avoid confusion.

COVID-19 = coronavirus disease 2019, FDA = Food and Drug Administration.
