# Supplementary material for: A Phase 2/3 study of S-217622 in participants with SARS-CoV-2 infection (Phase 3 part)
Source: bioRxiv or medRxiv preprint supplement (doi:10.1101/2022.07.15.22277670), 2023-01-12
Supplement: Supplementary file [file media-1.pdf]

### 16.1.3 List of IRBs

Japan

| Study Center Name                                                                 | Name of IRB / IEC                                                                                   | Chair Name         |
|-----------------------------------------------------------------------------------|-----------------------------------------------------------------------------------------------------|--------------------|
| Kodaira Hospital                                                                  | Sugiura Clinic<br>Institutional Review<br>Board                                                     | Kazuhiko<br>Watabe |
| Swing Nozaki Clinic                                                               |                                                                                                     |                    |
| Kasukabe Medical Center                                                           |                                                                                                     |                    |
| Japan Community Health care Organization Tokyo<br>Shinjuku Medical Center         |                                                                                                     |                    |
| Kouwakai Kouwa Clinic                                                             |                                                                                                     |                    |
| Onga Nakama Medical Association Onga Hospital                                     |                                                                                                     |                    |
| Tsuchiura Beryl Clinic                                                            |                                                                                                     |                    |
| Edogawa Medicare Hospital                                                         |                                                                                                     |                    |
| Kamezawa Clinic                                                                   |                                                                                                     |                    |
| Ginza Sawada Clinic                                                               |                                                                                                     |                    |
| Yaguchi Midori Clinic                                                             |                                                                                                     |                    |
| Kanagawa Himawari Clinic                                                          |                                                                                                     |                    |
| Minna no Tennocho Clinic                                                          |                                                                                                     |                    |
| Matsunami General Hospital                                                        |                                                                                                     |                    |
| Japan Community Health care Organization Shimonoseki<br>Medical Center            |                                                                                                     |                    |
| Irie Clinic                                                                       |                                                                                                     |                    |
| Fukuoka Shinmizumaki Hospital                                                     |                                                                                                     |                    |
| Tashiro Thyroid Clinic                                                            |                                                                                                     |                    |
| JA Toride Medical Center                                                          | Review Board of Human<br>Rights and Ethics for<br>Clinical Studies<br>Institutional Review<br>Board | Norihiko Basugi    |
| Moriya Keiyu Hospital                                                             |                                                                                                     |                    |
| Japan Community Health care Organization Osaka Minato<br>Central Hospital         |                                                                                                     |                    |
| Kinki Central Hospital of the Mutual Aid Association of<br>Public School Teachers |                                                                                                     |                    |
| Medical Corporation Kouhoukai Takagi Hospital                                     |                                                                                                     |                    |
| Fujimaki Ent Clinic                                                               | Yoga Allergy Clinic<br>Institutional Review<br>Board                                                | Tadao<br>Kawamura  |
| Takinogawa Hospital                                                               |                                                                                                     |                    |
| Kaiseikai Kita Shin Yokohama Internal Medicine Clinic                             |                                                                                                     |                    |
| Nakahama Clinic                                                                   |                                                                                                     |                    |
| Lee Clinic                                                                        |                                                                                                     |                    |
| National Hospital Organization Kanazawa Medical Center                            | National Hospital<br>Organization Kanazawa<br>Medical Center<br>Institutional Review<br>Board       | Ichiro Onishi      |

|                                                                       |                                                                                               |                   |
|-----------------------------------------------------------------------|-----------------------------------------------------------------------------------------------|-------------------|
| Koga General Hospital                                                 | Tokushukai Group Institutional Review Board                                                   | Suminobu Ito      |
| Kamagaya General Hospital                                             |                                                                                               |                   |
| Nozaki Tokushukai Hospital                                            |                                                                                               |                   |
| Ikoma City Hospital                                                   |                                                                                               |                   |
| Showa University Hospital                                             | Showa University Hospital Institutional Review Board                                          | Takaaki Matsuyama |
| Showa University East Hospital                                        |                                                                                               |                   |
| Yokohama Municipal Citizen's Hospital                                 | Yokohama Municipal Citizen's Hospital Institutional Review Board                              | Akihiro Nakazawa  |
| Aso Iizuka Hospital                                                   | Aso Iizuka Hospital Institutional Review Board                                                | Toshihiko Hara    |
| Red Cross Kyoto Daini Hospital                                        | Japanese Red Cross Society Japanese Red Cross Kyoto Daini Hospital Institutional Review Board | Koji Uno          |
| University Hospital Kyoto Prefectural University of Medicine          | University Hospital Kyoto Prefectural University of Medicine Institutional Review Board       | Osamu Ukimura     |
| Tokyo Metropolitan Health and Hospitals Corporation Toshima Hospital  | Tokyo Metropolitan Health and Hospitals Toshima Hospital Institutional Review Board           | Akihiro Hata      |
| IUHW Narita Hospital                                                  | International University of Health and Welfare and Institutional Review Board                 | Tsutomu Yamazaki  |
| Center Hospital of the National Center for Global Health and Medicine | Center Hospital of National Center for Global Health and Medicine IRB                         | Takeshi Tamaki    |
| Hokkaido University Hospital                                          | Hokkaido University Hospital Institutional Review Board                                       | Mitsuru Sugawara  |
| Sapporo Medical University Hospital                                   | Sapporo Medical University Hospital Institutional Review Board                                | Masahide Fukudo   |

|                                                                           |                                                                                                      |                    |
|---------------------------------------------------------------------------|------------------------------------------------------------------------------------------------------|--------------------|
| Denenchofu Family Clinic                                                  | Kobori Central Clinical Research Ethics Committee                                                    | Matsunobu Suko     |
| Osaka Rosai Hospital                                                      | Osaka Rosai Hospital Institutional Review Board                                                      | Naoki Hiramatsu    |
| Kojunkai Daido Medicine                                                   | Daido Hospital Institutional Review Board                                                            | Yasuhiro Terashima |
| Rinku General Medical Center                                              | Rinku General Medical Center IRB                                                                     | Takashi Shigematsu |
| University of Tsukuba Hospital                                            | Institutional Review Board, University of Tsukuba Hospital                                           | Ikuo Sekine        |
| Nagasaki University Hospital                                              | Nagasaki University Hospital Institutional Review Board                                              | Yasuhiro Nagata    |
| Tokyo Medical University Hachioji Medical Center                          | Tokyo Medical University Hachioji Medical Center Institutional Review Board                          | Hiroyuki Jinbo     |
| IMSUT Hospital, The Institute of Medical Science, The University of Tokyo | IMSUT Hospital, The Institute of Medical Science, The University of Tokyo Institutional Review Board | Ken Ishii          |
| Fujita Health University Okazaki Medical Center                           | The Central Institutional Review Board for the Fujita Health University Hospitals                    | Yoshiki Hirooka    |
| National Hospital Organization Yokohama Medical Center                    | National Hospital Organization Yokohama Medical Center Institutional Review Board                    | Kotaro Hirai       |
| Okinawa National Hospital                                                 | Okinawa National Hospital Clinical Trial Review Committee                                            | Hidenori Kawasaki  |
| National Hospital Organization Kobe Medical Center                        | National Hospital Organization Kobe Medical Center Institutional Review Board                        | Yoichi Miwa        |
| National Hospital Organization Himeji Medical Center                      | National Hospital Organization Himeji                                                                | Mitsuhiro Ueda     |

|                                                                            |                                                                                                       |                    |
|----------------------------------------------------------------------------|-------------------------------------------------------------------------------------------------------|--------------------|
|                                                                            | Medical Center Institutional Review Board                                                             |                    |
| National Hospital Organization Fukuoka National Hospital                   | National Hospital Organization Fukuoka National Hospital Institutional Review Board                   | Hitoshi Ueda       |
| National Hospital Organization Chiba Medical Center                        | National Hospital Organization Chiba Medical Center Institutional Review Board                        | Akihiko Okawa      |
| Japan Community Health Care Organization Hokkaido Hospital                 | Review Board of Japan Community Health care Organization Hokkaido Hospital                            | Takashi Yamada     |
| Hamamatsu Medical Center                                                   | Hamamatsu Medical Center Institutional Review Board                                                   | Mitsuharu Iijima   |
| Nagoya City University East Medical Center                                 | NCU East • West Medical Center Institutional Review Board                                             | Yoshimasa Murakami |
| Tokyo Metropolitan Bokutoh Hospital                                        | Tokyo Metropolitan Bokutoh Hospital Institutional Review Board                                        | Toru Tanizawa      |
| Tokyo Metropolitan Cancer and Infectious Diseases Center Komagome Hospital | Tokyo Metropolitan Cancer and Infectious Diseases Center Komagome Hospital Institutional Review Board | Yukio Hosomi       |
| Keiwakai Nishioka Hospital                                                 | Sapporo Medical Association's Institutional Review Board                                              | Minoru Horie       |

South Korea

| <b>Study Center Name</b>                                  | <b>Name of IRB / IEC</b>                                                    | <b>Chair Name</b> |
|-----------------------------------------------------------|-----------------------------------------------------------------------------|-------------------|
| Gachon University Gil Medical Center                      | Gachon University Gil Medical Center Institutional Review Board             | Jong Hoon Kim     |
| The Catholic Univ. of Korea Bucheon St. Mary's Hospital   | The Catholic Medical Center Central Institutional Review Board              | Hyeon-Woo Yim     |
| The Catholic Univ. of Korea Eunpyeong St. Mary's Hospital | The Catholic Medical Center Central Institutional Review Board              | Hyeon-Woo Yim     |
| Gangnam Severance Hospital                                | Gangnam Severance Hospital Institutional Review Board                       | Joon-Seong Park   |
| KyungHee University Hospital at Gangdong                  | Kyung Hee University Hospital at Gangdong, Institutional Review Board       | Gitaek Kim        |
| Kyungpook National University Hospital                    | Kyungpook National University Hospital IRB                                  | Won-ju Lee        |
| KyungHee University Medical Center                        | Kyung Hee University Hospital, Institutional Review Board                   | Juhyeong Oh       |
| Keimyung University Daegu Dongsan Hospital                | Keimyung University Daegu dongsan Medical Center Institutional Review Board | Jinwook Chung     |
| Korea University Anam Hospital                            | Korea University Hospital IRB                                               | Kim Yeul Hong     |
| Dongguk University Ilsan Hospital                         | Dogguk University Ilsan Hospital Institutional Review Board                 | Jaewoo Jeong      |
| Bupyeong Serim Hospital                                   | IRB of Bupyeong Serim Hospital                                              | Jae Hak Lee       |
| Yongin Severance Hospital                                 | YONGIN SEVERANCE HOSPITAL Institutional Review Board                        | Kim, ChulSik      |
| Uijeongbu Eulji Medical Center, Eulji University          | Uijeongbu Eulji Medical Center, Eulji University Institutional Review Board | Eun-Jeong Joo     |
| Ewha Womans University Mokdong Hospital                   | Ewha Womans University Mokdong Hospital Institutional Review Board          | Yoon Hee Choi     |

|                                                          |                                                                                                           |                 |
|----------------------------------------------------------|-----------------------------------------------------------------------------------------------------------|-----------------|
| Inje University Ilsan Paik Hospital                      | Inje University Ilsan Paik Hospital IRB                                                                   | Yeon Soo Kim    |
| Incheon Medical Center                                   | Incheon Medical Center Institutional Review Board                                                         | Sungwon Park    |
| Inha University Hospital                                 | Inha University Hospital IRB                                                                              | Cho Sang-Hun    |
| Chung-Ang University Health Care System Hyundae Hospital | Chung-Ang University Healthcare System Hyundae Hospital Institutional Review Board                        | Buseop Kim      |
| Chung-Ang University Hospital                            | Chung-Ang University Hospital Institutional Review Board                                                  | L.J.K.          |
| VHS Medical Center                                       | VHS Medical Center Institutional Review Board                                                             | Young Bae Kim   |
| Kyungpook National University Chilgok Hospital           | Kyungpook National University Chilgok Hospital Institutional Review Board                                 | Taegyun Kwon    |
| SMG-SNU Boramae Medical Center                           | Seoul Metropolitan Government Seoul National University Boramae Medical Center Institutional Review Board | Seung-Baik Kang |
| Incheon Sejong Hospital                                  | Incheon Sejong Hospital Institutional Review Board                                                        | Chang Keun Lee  |
| Myongji Hospital                                         | Myongji Hospital Institutional Review Board                                                               | Kim Joo Hak     |
| Chungnam National University Sejong Hospital             | Chungnam National University Sejong Hospital Institutional Review Board                                   | Hee-Jung Song   |

## Vietnam

| <b>Study Center Name</b>                                | <b>Name of IRB / IEC</b>                                                                           | <b>Chair Name</b> |
|---------------------------------------------------------|----------------------------------------------------------------------------------------------------|-------------------|
| University of Medicine and Pharmacy in Ho Chi Minh city | Ethics Committee in Biomedical Research of University of Medicine and Pharmacy in Ho Chi Minh city | Do Van Dung       |
| Hanoi Medical University                                | Hanoi Medical University Institutional Ethical Review Board                                        | Le Minh Giang     |
